# Supplementary material
Source: MDPI journal article supplement (https://www.mdpi.com/2075-1680/12/6/601)
Supplement: s1 [file s1]

## Supplementary Materials

### Statistical Analysis of Type-II Generalized Progressively Hybrid Alpha-PIE Censored Data and Applications in Electronic Tubes and Vinyl Chloride

Ahmed Elshahhat<sup>1\*</sup>, Osama E. Abo-Kasem<sup>2</sup> and Heba S. Mohammed<sup>3</sup>

<sup>1</sup>Faculty of Technology and Development, Zagazig University, Zagazig 44519, Egypt

<sup>2</sup>Department of Statistics, Faculty of Commerce, Zagazig University, Zagazig 44519, Egypt

<sup>3</sup>Department of Mathematical Sciences, College of Science, Princess Nourah bint Abdulrahman University,

P.O. Box 84428, Riyadh 11671, Saudi Arabia

Table S1: The Av.Es (1<sup>st</sup> column), RMSEs (2<sup>nd</sup> column) and MRABs (3<sup>rd</sup> column) of  $\alpha$  from Set-1.

| $(T_1, T_2)$<br>Prior $\rightarrow$ | $n$ [FP%] | Scheme | MLE    |        |        | MCMC   |        |        |        |        |        |
|-------------------------------------|-----------|--------|--------|--------|--------|--------|--------|--------|--------|--------|--------|
|                                     |           |        |        |        |        | 1      |        |        | 2      |        |        |
| (0.1,0.3)                           | 50[40%]   | 1      | 1.9865 | 0.6652 | 0.7837 | 0.9559 | 0.2612 | 0.2048 | 1.2778 | 0.1263 | 0.1484 |
|                                     |           | 2      | 2.0952 | 0.6967 | 0.8271 | 0.9629 | 0.2574 | 0.1991 | 1.2740 | 0.1219 | 0.1270 |
|                                     |           | 3      | 1.8771 | 0.8009 | 0.9331 | 0.9629 | 0.2517 | 0.1920 | 1.2741 | 0.1193 | 0.1197 |
|                                     | 50[80%]   | 1      | 1.8437 | 0.6306 | 0.6403 | 1.0622 | 0.1915 | 0.1459 | 1.2444 | 0.1172 | 0.1122 |
|                                     |           | 2      | 1.6702 | 0.6645 | 0.7155 | 1.0478 | 0.2040 | 0.1541 | 1.2447 | 0.1066 | 0.0973 |
|                                     |           | 3      | 2.0952 | 0.6967 | 0.8271 | 0.9629 | 0.2547 | 0.1878 | 1.2449 | 0.0990 | 0.0868 |
|                                     | 80[40%]   | 1      | 1.1694 | 0.4832 | 0.4769 | 1.2456 | 0.1384 | 0.1155 | 1.2627 | 0.0981 | 0.0841 |
|                                     |           | 2      | 1.7163 | 0.5444 | 0.5355 | 1.3022 | 0.1469 | 0.1192 | 1.2620 | 0.0928 | 0.0806 |
|                                     |           | 3      | 1.3833 | 0.5761 | 0.6215 | 1.3255 | 0.1633 | 0.1275 | 1.2449 | 0.0910 | 0.0780 |
|                                     | 80[80%]   | 1      | 1.2200 | 0.3845 | 0.4267 | 1.2887 | 0.1302 | 0.0832 | 1.2091 | 0.0854 | 0.0785 |
|                                     |           | 2      | 1.1958 | 0.4614 | 0.5188 | 1.2407 | 0.1412 | 0.0940 | 1.2104 | 0.0857 | 0.0753 |
|                                     |           | 3      | 1.5855 | 0.5220 | 0.5559 | 1.2872 | 0.1544 | 0.1067 | 1.2125 | 0.0866 | 0.0727 |
| (0.4,0.8)                           | 50[40%]   | 1      | 1.8437 | 0.6506 | 0.7255 | 0.9715 | 0.2461 | 0.1922 | 1.2767 | 0.1251 | 0.1039 |
|                                     |           | 2      | 1.9466 | 0.6887 | 0.7726 | 0.9658 | 0.2520 | 0.1970 | 1.2778 | 0.1260 | 0.1049 |
|                                     |           | 3      | 2.2170 | 0.7436 | 0.8981 | 0.9538 | 0.2635 | 0.2066 | 1.2730 | 0.1209 | 0.1008 |
|                                     | 50[80%]   | 1      | 1.5400 | 0.5818 | 0.5886 | 1.2728 | 0.1470 | 0.1050 | 1.2427 | 0.0887 | 0.0862 |
|                                     |           | 2      | 1.4158 | 0.5798 | 0.7002 | 1.0656 | 0.1879 | 0.1098 | 1.2639 | 0.1086 | 0.0933 |
|                                     |           | 3      | 1.7806 | 0.5633 | 0.6927 | 0.9715 | 0.2261 | 0.1223 | 1.2743 | 0.1190 | 0.1019 |
|                                     | 80[40%]   | 1      | 1.2081 | 0.4485 | 0.4658 | 1.2777 | 0.1189 | 0.0845 | 1.2420 | 0.0861 | 0.0761 |
|                                     |           | 2      | 1.5038 | 0.4595 | 0.5019 | 1.3006 | 0.1416 | 0.1021 | 1.2427 | 0.0887 | 0.0792 |
|                                     |           | 3      | 1.3319 | 0.5177 | 0.5816 | 1.2558 | 0.1449 | 0.1085 | 1.2444 | 0.0905 | 0.0776 |
|                                     | 80[80%]   | 1      | 1.3051 | 0.1441 | 0.4040 | 1.1491 | 0.1105 | 0.0792 | 1.2091 | 0.0814 | 0.0707 |
|                                     |           | 2      | 1.1189 | 0.1572 | 0.4887 | 1.2816 | 0.1312 | 0.0904 | 1.2121 | 0.0864 | 0.0728 |
|                                     |           | 3      | 1.4165 | 0.4539 | 0.5253 | 1.2696 | 0.1370 | 0.1011 | 1.2108 | 0.0892 | 0.0763 |

---

\*Email: aelshahhat@ftd.zu.edu.eg

Table S2: The Av.Es ( $1^{st}$  column), RMSEs ( $2^{nd}$  column) and MRABs ( $3^{rd}$  column) of  $\alpha$  from Set-2.

| $(T_1, T_2)$<br>Prior $\rightarrow$ | $n$ [FP%] | Scheme | MLE    |        |        | MCMC   |        |        |        |        |        |
|-------------------------------------|-----------|--------|--------|--------|--------|--------|--------|--------|--------|--------|--------|
|                                     |           |        |        |        |        | 1      |        |        | 2      |        |        |
| (0.1,0.3)                           | 50[40%]   | 1      | 1.9783 | 0.6943 | 0.6350 | 1.5598 | 0.2569 | 0.1608 | 1.5786 | 0.1706 | 0.1024 |
|                                     |           | 2      | 1.9578 | 0.8564 | 0.7508 | 1.5704 | 0.2609 | 0.1711 | 1.5758 | 0.1838 | 0.1222 |
|                                     |           | 3      | 1.9885 | 0.9314 | 0.8606 | 1.5704 | 0.2855 | 0.1932 | 1.5758 | 0.2138 | 0.1405 |
|                                     | 50[80%]   | 1      | 1.6952 | 0.6354 | 0.5987 | 1.2615 | 0.1820 | 0.1471 | 1.5461 | 0.1521 | 0.0911 |
|                                     |           | 2      | 1.5900 | 0.8218 | 0.7123 | 1.2579 | 0.1838 | 0.1522 | 1.5449 | 0.1593 | 0.1080 |
|                                     |           | 3      | 1.8036 | 0.8764 | 0.8290 | 1.2579 | 0.1888 | 0.1674 | 1.5449 | 0.1619 | 0.1232 |
|                                     | 80[40%]   | 1      | 1.6001 | 0.5645 | 0.5344 | 1.3724 | 0.1500 | 0.1093 | 1.5689 | 0.1234 | 0.0859 |
|                                     |           | 2      | 1.6077 | 0.7056 | 0.6201 | 1.3785 | 0.1568 | 0.1103 | 1.5700 | 0.1345 | 0.0967 |
|                                     |           | 3      | 1.6116 | 0.7511 | 0.7423 | 1.3769 | 0.1678 | 0.1270 | 1.5702 | 0.1423 | 0.1097 |
|                                     | 80[80%]   | 1      | 1.5891 | 0.5815 | 0.4208 | 1.3162 | 0.1356 | 0.0875 | 1.1375 | 0.1132 | 0.0745 |
|                                     |           | 2      | 1.4837 | 0.6653 | 0.5565 | 1.4090 | 0.1423 | 0.0915 | 1.5173 | 0.1278 | 0.0762 |
|                                     |           | 3      | 1.6684 | 0.6865 | 0.6956 | 1.4290 | 0.1561 | 0.1071 | 1.5173 | 0.1378 | 0.0856 |
| (0.4,0.8)                           | 50[40%]   | 1      | 1.9308 | 0.6821 | 0.6160 | 1.2760 | 0.2418 | 0.1510 | 1.5742 | 0.0819 | 0.0947 |
|                                     |           | 2      | 1.8948 | 0.8363 | 0.7264 | 1.2709 | 0.2471 | 0.1544 | 1.5758 | 0.0837 | 0.1051 |
|                                     |           | 3      | 1.7465 | 0.9169 | 0.8295 | 1.2643 | 0.2537 | 0.1587 | 1.5779 | 0.0862 | 0.1159 |
|                                     | 50[80%]   | 1      | 1.7264 | 0.6253 | 0.5625 | 1.3733 | 0.1783 | 0.1112 | 1.5685 | 0.0728 | 0.0757 |
|                                     |           | 2      | 1.6423 | 0.7610 | 0.6929 | 1.3724 | 0.1801 | 0.1127 | 1.5689 | 0.0734 | 0.0859 |
|                                     |           | 3      | 1.3023 | 0.7983 | 0.7823 | 1.3640 | 0.1838 | 0.1144 | 1.5703 | 0.0745 | 0.0947 |
|                                     | 80[40%]   | 1      | 1.5276 | 0.5165 | 0.5023 | 1.5665 | 0.1472 | 0.0890 | 1.5458 | 0.0517 | 0.0584 |
|                                     |           | 2      | 1.5202 | 0.6223 | 0.5820 | 1.5675 | 0.1549 | 0.0978 | 1.5458 | 0.0518 | 0.0622 |
|                                     |           | 3      | 1.6517 | 0.6755 | 0.7167 | 1.5779 | 0.1574 | 0.0991 | 1.5461 | 0.0520 | 0.0734 |
|                                     | 80[80%]   | 1      | 1.5796 | 0.5382 | 0.3728 | 1.5757 | 0.1258 | 0.0664 | 1.5093 | 0.0442 | 0.0402 |
|                                     |           | 2      | 1.5145 | 0.5949 | 0.4851 | 1.5891 | 0.1381 | 0.0748 | 1.5139 | 0.0454 | 0.0479 |
|                                     |           | 3      | 1.5895 | 0.6152 | 0.5690 | 1.5864 | 0.1486 | 0.0853 | 1.5137 | 0.0467 | 0.0611 |

Table S3: The Av.Es ( $1^{st}$  column), RMSEs ( $2^{nd}$  column) and MRABs ( $3^{rd}$  column) of  $\mu$  from Set-1.

| $(T_1, T_2)$<br>Prior $\rightarrow$ | $n$ [FP%] | Scheme | MLE    |        |        | MCMC   |        |        |        |        |        |
|-------------------------------------|-----------|--------|--------|--------|--------|--------|--------|--------|--------|--------|--------|
|                                     |           |        |        |        |        | 1      |        |        | 2      |        |        |
| (0.1,0.3)                           | 50[40%]   | 1      | 0.2238 | 0.0786 | 0.3064 | 0.2328 | 0.0615 | 0.2282 | 0.2419 | 0.0517 | 0.2171 |
|                                     |           | 2      | 0.2236 | 0.0784 | 0.3024 | 0.2325 | 0.0422 | 0.1711 | 0.2174 | 0.0394 | 0.1516 |
|                                     |           | 3      | 0.2172 | 0.0788 | 0.2980 | 0.2259 | 0.0369 | 0.1444 | 0.2111 | 0.0346 | 0.1359 |
|                                     | 50[80%]   | 1      | 0.2124 | 0.0693 | 0.2706 | 0.1664 | 0.0417 | 0.1785 | 0.1878 | 0.0321 | 0.1439 |
|                                     |           | 2      | 0.2146 | 0.0689 | 0.2683 | 0.1719 | 0.0383 | 0.1650 | 0.1826 | 0.0284 | 0.1193 |
|                                     |           | 3      | 0.2129 | 0.0671 | 0.2599 | 0.1728 | 0.0325 | 0.1412 | 0.1798 | 0.0295 | 0.1204 |
|                                     | 80[40%]   | 1      | 0.2095 | 0.0630 | 0.2478 | 0.1699 | 0.0355 | 0.1546 | 0.1911 | 0.0256 | 0.1152 |
|                                     |           | 2      | 0.2147 | 0.0607 | 0.2343 | 0.1739 | 0.0341 | 0.1401 | 0.1934 | 0.0237 | 0.1067 |
|                                     |           | 3      | 0.2139 | 0.0595 | 0.2285 | 0.1761 | 0.0313 | 0.1318 | 0.1930 | 0.0242 | 0.1009 |
|                                     | 80[80%]   | 1      | 0.2073 | 0.0550 | 0.2125 | 0.1834 | 0.0302 | 0.1229 | 0.1825 | 0.0232 | 0.0987 |
|                                     |           | 2      | 0.2081 | 0.0536 | 0.2060 | 0.1888 | 0.0297 | 0.1181 | 0.1827 | 0.0230 | 0.0972 |
|                                     |           | 3      | 0.2074 | 0.0516 | 0.2004 | 0.1881 | 0.0267 | 0.1091 | 0.1947 | 0.0220 | 0.0898 |
| (0.4,0.8)                           | 50[40%]   | 1      | 0.2209 | 0.0754 | 0.2956 | 0.2304 | 0.0579 | 0.2192 | 0.2477 | 0.0518 | 0.2018 |
|                                     |           | 2      | 0.2150 | 0.0733 | 0.2854 | 0.2373 | 0.0524 | 0.2069 | 0.2393 | 0.0490 | 0.1905 |
|                                     |           | 3      | 0.2106 | 0.0639 | 0.2494 | 0.2347 | 0.0441 | 0.1795 | 0.2198 | 0.0408 | 0.1570 |
|                                     | 50[80%]   | 1      | 0.2111 | 0.0656 | 0.2565 | 0.1681 | 0.0405 | 0.1719 | 0.1893 | 0.0315 | 0.1422 |
|                                     |           | 2      | 0.2118 | 0.0650 | 0.2532 | 0.1702 | 0.0344 | 0.1519 | 0.1822 | 0.0290 | 0.1219 |
|                                     |           | 3      | 0.1642 | 0.0584 | 0.2308 | 0.1739 | 0.0330 | 0.1398 | 0.2035 | 0.0224 | 0.1083 |
|                                     | 80[40%]   | 1      | 0.2084 | 0.0617 | 0.2404 | 0.1699 | 0.0356 | 0.1553 | 0.1910 | 0.0256 | 0.1151 |
|                                     |           | 2      | 0.2132 | 0.0590 | 0.2277 | 0.1711 | 0.0338 | 0.1482 | 0.1907 | 0.0246 | 0.1099 |
|                                     |           | 3      | 0.1593 | 0.0554 | 0.2198 | 0.1843 | 0.0297 | 0.1205 | 0.1916 | 0.0240 | 0.0989 |
|                                     | 80[80%]   | 1      | 0.2059 | 0.0526 | 0.2038 | 0.1865 | 0.0277 | 0.1122 | 0.1825 | 0.0232 | 0.0968 |
|                                     |           | 2      | 0.2064 | 0.0512 | 0.1977 | 0.1875 | 0.0269 | 0.1090 | 0.1839 | 0.0220 | 0.0932 |
|                                     |           | 3      | 0.2052 | 0.0499 | 0.1926 | 0.1825 | 0.0249 | 0.0987 | 0.1854 | 0.0208 | 0.0879 |

Table S4: The Av.Es ( $1^{st}$  column), RMSEs ( $2^{nd}$  column) and MRABs ( $3^{rd}$  column) of  $\mu$  from Set-2.

| $(T_1, T_2)$<br>Prior $\rightarrow$ | $n$ [FP%] | Scheme | MLE    |        |        | MCMC   |        |        |        |        |        |
|-------------------------------------|-----------|--------|--------|--------|--------|--------|--------|--------|--------|--------|--------|
|                                     |           |        |        |        |        | 1      |        |        | 2      |        |        |
| (0.1,0.3)                           | 50[40%]   | 1      | 0.6182 | 0.3387 | 0.4636 | 0.6409 | 0.2630 | 0.2204 | 0.5581 | 0.1703 | 0.1671 |
|                                     |           | 2      | 0.6170 | 0.3133 | 0.4366 | 0.5831 | 0.2493 | 0.1972 | 0.5565 | 0.1683 | 0.1434 |
|                                     |           | 3      | 0.6065 | 0.3063 | 0.4246 | 0.5471 | 0.2316 | 0.1808 | 0.5475 | 0.1673 | 0.1270 |
|                                     | 50[80%]   | 1      | 0.5951 | 0.2850 | 0.4048 | 0.4503 | 0.2676 | 0.1830 | 0.5168 | 0.1465 | 0.1371 |
|                                     |           | 2      | 0.5926 | 0.2760 | 0.3964 | 0.4476 | 0.2147 | 0.1736 | 0.5136 | 0.1426 | 0.1134 |
|                                     |           | 3      | 0.5906 | 0.2560 | 0.3764 | 0.4266 | 0.2028 | 0.1547 | 0.5119 | 0.1388 | 0.1065 |
|                                     | 80[40%]   | 1      | 0.5636 | 0.2159 | 0.3470 | 0.4525 | 0.1973 | 0.1699 | 0.5375 | 0.1371 | 0.0969 |
|                                     |           | 2      | 0.5587 | 0.2115 | 0.3209 | 0.4796 | 0.1799 | 0.1540 | 0.5248 | 0.1148 | 0.0972 |
|                                     |           | 3      | 0.5255 | 0.1667 | 0.2626 | 0.4713 | 0.1484 | 0.1404 | 0.5143 | 0.1019 | 0.0963 |
|                                     | 80[80%]   | 1      | 0.5471 | 0.1983 | 0.2930 | 0.4180 | 0.1727 | 0.1424 | 0.5281 | 0.1179 | 0.0632 |
|                                     |           | 2      | 0.5371 | 0.1783 | 0.2530 | 0.4327 | 0.1528 | 0.1246 | 0.5147 | 0.1069 | 0.0587 |
|                                     |           | 3      | 0.5315 | 0.1580 | 0.2242 | 0.4162 | 0.1219 | 0.1163 | 0.5135 | 0.1005 | 0.0499 |
| (0.4,0.8)                           | 50[40%]   | 1      | 0.5493 | 0.2097 | 0.3237 | 0.6012 | 0.2271 | 0.2049 | 0.5568 | 0.1588 | 0.1196 |
|                                     |           | 2      | 0.5651 | 0.2085 | 0.3206 | 0.5603 | 0.2050 | 0.1752 | 0.5550 | 0.1366 | 0.1149 |
|                                     |           | 3      | 0.5614 | 0.2071 | 0.3146 | 0.5477 | 0.1812 | 0.1598 | 0.5515 | 0.1290 | 0.1095 |
|                                     | 50[80%]   | 1      | 0.5353 | 0.1899 | 0.2978 | 0.4180 | 0.1673 | 0.1799 | 0.5207 | 0.1295 | 0.0915 |
|                                     |           | 2      | 0.5396 | 0.1843 | 0.2872 | 0.4347 | 0.1590 | 0.1654 | 0.5210 | 0.1154 | 0.0842 |
|                                     |           | 3      | 0.5354 | 0.1788 | 0.2775 | 0.4371 | 0.1461 | 0.1313 | 0.5201 | 0.1080 | 0.0716 |
|                                     | 80[40%]   | 1      | 0.5255 | 0.1767 | 0.2626 | 0.4499 | 0.1422 | 0.1387 | 0.5375 | 0.1097 | 0.0769 |
|                                     |           | 2      | 0.5400 | 0.1608 | 0.2485 | 0.4494 | 0.1313 | 0.1258 | 0.5247 | 0.0904 | 0.0619 |
|                                     |           | 3      | 0.5366 | 0.1578 | 0.2221 | 0.4525 | 0.1271 | 0.1122 | 0.5193 | 0.0866 | 0.0592 |
|                                     | 80[80%]   | 1      | 0.5203 | 0.1685 | 0.2386 | 0.4676 | 0.1366 | 0.1109 | 0.4974 | 0.0909 | 0.0430 |
|                                     |           | 2      | 0.5220 | 0.1531 | 0.2199 | 0.4803 | 0.1293 | 0.0981 | 0.4918 | 0.0836 | 0.0418 |
|                                     |           | 3      | 0.5194 | 0.1426 | 0.2058 | 0.4792 | 0.1189 | 0.0973 | 0.4956 | 0.0803 | 0.0388 |

Table S5: The Av.Es ( $1^{st}$  column), RMSEs ( $2^{nd}$  column) and MRABs ( $3^{rd}$  column) of  $R(t)$  from Set-1.

| $(T_1, T_2)$<br>Prior $\rightarrow$ | $n$ [FP%] | Scheme | MLE    |        |        | MCMC   |        |        |        |        |        |
|-------------------------------------|-----------|--------|--------|--------|--------|--------|--------|--------|--------|--------|--------|
|                                     |           |        |        |        |        | 1      |        |        | 2      |        |        |
| (0.1,0.3)                           | 50[40%]   | 1      | 0.8779 | 0.1520 | 0.0791 | 0.8072 | 0.1328 | 0.0493 | 0.9217 | 0.0520 | 0.0474 |
|                                     |           | 2      | 0.8783 | 0.1467 | 0.0592 | 0.8246 | 0.1117 | 0.0426 | 0.9146 | 0.0473 | 0.0403 |
|                                     |           | 3      | 0.8811 | 0.1403 | 0.0559 | 0.8276 | 0.1083 | 0.0392 | 0.9111 | 0.0434 | 0.0375 |
|                                     | 50[80%]   | 1      | 0.8810 | 0.1402 | 0.0546 | 0.8317 | 0.1112 | 0.0453 | 0.8578 | 0.0446 | 0.0416 |
|                                     |           | 2      | 0.8813 | 0.1384 | 0.0483 | 0.8380 | 0.1043 | 0.0410 | 0.8498 | 0.0420 | 0.0376 |
|                                     |           | 3      | 0.8814 | 0.1371 | 0.0453 | 0.8413 | 0.1011 | 0.0358 | 0.9031 | 0.0378 | 0.0295 |
|                                     | 80[40%]   | 1      | 0.8770 | 0.1392 | 0.0486 | 0.8321 | 0.1046 | 0.0391 | 0.8615 | 0.0367 | 0.0336 |
|                                     |           | 2      | 0.8769 | 0.1345 | 0.0462 | 0.8339 | 0.1009 | 0.0331 | 0.8494 | 0.0349 | 0.0314 |
|                                     |           | 3      | 0.8790 | 0.1300 | 0.0460 | 0.8393 | 0.0967 | 0.0318 | 0.8516 | 0.0328 | 0.0284 |
|                                     | 80[80%]   | 1      | 0.8780 | 0.1321 | 0.0495 | 0.9014 | 0.1018 | 0.0343 | 0.8496 | 0.0329 | 0.0326 |
|                                     |           | 2      | 0.8781 | 0.1298 | 0.0415 | 0.8901 | 0.0973 | 0.0299 | 0.8646 | 0.0326 | 0.0286 |
|                                     |           | 3      | 0.8780 | 0.1294 | 0.0373 | 0.8840 | 0.0877 | 0.0263 | 0.8540 | 0.0308 | 0.0272 |
| (0.4,0.8)                           | 50[40%]   | 1      | 0.8779 | 0.1508 | 0.0587 | 0.8100 | 0.1301 | 0.0534 | 0.9166 | 0.0492 | 0.0454 |
|                                     |           | 2      | 0.8786 | 0.1422 | 0.0519 | 0.8250 | 0.1112 | 0.0441 | 0.8555 | 0.0461 | 0.0392 |
|                                     |           | 3      | 0.8812 | 0.1368 | 0.0484 | 0.8330 | 0.1099 | 0.0391 | 0.9092 | 0.0421 | 0.0351 |
|                                     | 50[80%]   | 1      | 0.8776 | 0.1400 | 0.0533 | 0.8314 | 0.1050 | 0.0474 | 0.8465 | 0.0431 | 0.0368 |
|                                     |           | 2      | 0.8810 | 0.1370 | 0.0481 | 0.8414 | 0.1016 | 0.0391 | 0.8505 | 0.0408 | 0.0343 |
|                                     |           | 3      | 0.9015 | 0.1346 | 0.0465 | 0.8342 | 0.1010 | 0.0346 | 0.8494 | 0.0349 | 0.0333 |
|                                     | 80[40%]   | 1      | 0.8808 | 0.1381 | 0.0511 | 0.8400 | 0.1021 | 0.0384 | 0.8615 | 0.0347 | 0.0349 |
|                                     |           | 2      | 0.8773 | 0.1321 | 0.0476 | 0.8365 | 0.0993 | 0.0327 | 0.8613 | 0.0334 | 0.0293 |
|                                     |           | 3      | 0.8999 | 0.1326 | 0.0435 | 0.8932 | 0.0904 | 0.0305 | 0.8626 | 0.0325 | 0.0297 |
|                                     | 80[80%]   | 1      | 0.8778 | 0.1320 | 0.0475 | 0.8995 | 0.1002 | 0.0374 | 0.8500 | 0.0342 | 0.0294 |
|                                     |           | 2      | 0.8779 | 0.1297 | 0.0417 | 0.9107 | 0.0897 | 0.0314 | 0.8652 | 0.0311 | 0.0273 |
|                                     |           | 3      | 0.8781 | 0.1268 | 0.0353 | 0.8623 | 0.0821 | 0.0270 | 0.8798 | 0.0291 | 0.0264 |

Table S6: The Av.Es ( $1^{st}$  column), RMSEs ( $2^{nd}$  column) and MRABs ( $3^{rd}$  column) of  $R(t)$  from Set-2.

| $(T_1, T_2)$<br>Prior $\rightarrow$ | $n$ [FP%] | Scheme | MLE    |        |        | MCMC   |        |        |        |        |        |
|-------------------------------------|-----------|--------|--------|--------|--------|--------|--------|--------|--------|--------|--------|
|                                     |           |        |        |        |        | 1      |        |        | 2      |        |        |
| (0.1,0.3)                           | 50[40%]   | 1      | 0.9215 | 0.1660 | 0.1734 | 0.9981 | 0.1453 | 0.1154 | 0.9968 | 0.0815 | 0.0842 |
|                                     |           | 2      | 0.9940 | 0.1652 | 0.1739 | 0.9976 | 0.1413 | 0.1029 | 0.9967 | 0.0788 | 0.0781 |
|                                     |           | 3      | 0.9936 | 0.1645 | 0.1715 | 0.9970 | 0.1324 | 0.0988 | 0.9972 | 0.0758 | 0.0673 |
|                                     | 50[80%]   | 1      | 0.9936 | 0.1575 | 0.1524 | 0.9883 | 0.1293 | 0.0990 | 0.9953 | 0.0783 | 0.0748 |
|                                     |           | 2      | 0.9943 | 0.1459 | 0.1457 | 0.9881 | 0.1193 | 0.0948 | 0.9952 | 0.0754 | 0.0691 |
|                                     |           | 3      | 0.9940 | 0.1416 | 0.1363 | 0.9878 | 0.1078 | 0.0881 | 0.9957 | 0.0719 | 0.0594 |
|                                     | 80[40%]   | 1      | 0.9939 | 0.1463 | 0.1470 | 0.9851 | 0.1121 | 0.0927 | 0.9962 | 0.0695 | 0.0636 |
|                                     |           | 2      | 0.9945 | 0.1368 | 0.1348 | 0.9866 | 0.1088 | 0.0871 | 0.9958 | 0.0624 | 0.0542 |
|                                     |           | 3      | 0.9940 | 0.1319 | 0.1215 | 0.9872 | 0.1026 | 0.0827 | 0.9956 | 0.0592 | 0.0427 |
|                                     | 80[80%]   | 1      | 0.9934 | 0.1362 | 0.1389 | 0.9882 | 0.1047 | 0.0819 | 0.9945 | 0.0624 | 0.0586 |
|                                     |           | 2      | 0.9947 | 0.1326 | 0.1285 | 0.9918 | 0.0989 | 0.0714 | 0.9949 | 0.0577 | 0.0454 |
|                                     |           | 3      | 0.9943 | 0.1295 | 0.1139 | 0.9979 | 0.0886 | 0.0676 | 0.9953 | 0.0518 | 0.0428 |
| (0.4,0.8)                           | 50[40%]   | 1      | 0.9932 | 0.1594 | 0.1642 | 0.9974 | 0.1396 | 0.1151 | 0.9969 | 0.0788 | 0.0803 |
|                                     |           | 2      | 0.9937 | 0.1566 | 0.1547 | 0.9964 | 0.1358 | 0.1098 | 0.9967 | 0.0742 | 0.0755 |
|                                     |           | 3      | 0.9940 | 0.1560 | 0.1536 | 0.9959 | 0.1253 | 0.0943 | 0.9966 | 0.0737 | 0.0672 |
|                                     | 50[80%]   | 1      | 0.9935 | 0.1512 | 0.1453 | 0.9912 | 0.1243 | 0.0985 | 0.9948 | 0.0737 | 0.0724 |
|                                     |           | 2      | 0.9937 | 0.1429 | 0.1390 | 0.9915 | 0.1184 | 0.0914 | 0.9945 | 0.0722 | 0.0649 |
|                                     |           | 3      | 0.9943 | 0.1369 | 0.1286 | 0.9925 | 0.1059 | 0.0881 | 0.9955 | 0.0676 | 0.0537 |
|                                     | 80[40%]   | 1      | 0.9934 | 0.1406 | 0.1398 | 0.9851 | 0.1169 | 0.0884 | 0.9962 | 0.0643 | 0.0621 |
|                                     |           | 2      | 0.9940 | 0.1335 | 0.1286 | 0.9879 | 0.1077 | 0.0796 | 0.9956 | 0.0608 | 0.0537 |
|                                     |           | 3      | 0.9941 | 0.1278 | 0.1169 | 0.9882 | 0.0999 | 0.0769 | 0.9954 | 0.0538 | 0.0585 |
|                                     | 80[80%]   | 1      | 0.9936 | 0.1330 | 0.1125 | 0.9898 | 0.0989 | 0.0784 | 0.9943 | 0.0595 | 0.0569 |
|                                     |           | 2      | 0.9938 | 0.1275 | 0.1026 | 0.9901 | 0.0963 | 0.0712 | 0.9940 | 0.0543 | 0.0443 |
|                                     |           | 3      | 0.9937 | 0.1235 | 0.0909 | 0.9904 | 0.0846 | 0.0634 | 0.9942 | 0.0484 | 0.0388 |

Table S7: The Av.Es ( $1^{st}$  column), RMSEs ( $2^{nd}$  column) and MRABs ( $3^{rd}$  column) of  $h(t)$  from Set-1.

| $(T_1, T_2)$<br>Prior $\rightarrow$ | $n$ [FP%] | Scheme | MLE    |        |        | MCMC   |        |        |        |        |        |
|-------------------------------------|-----------|--------|--------|--------|--------|--------|--------|--------|--------|--------|--------|
|                                     |           |        |        |        |        | 1      |        |        | 2      |        |        |
| (0.1,0.3)                           | 50[40%]   | 1      | 3.8482 | 1.1344 | 0.3384 | 2.9076 | 1.0340 | 0.2939 | 2.0650 | 0.9287 | 0.2660 |
|                                     |           | 2      | 3.0111 | 0.9468 | 0.2968 | 3.5992 | 0.9279 | 0.2637 | 2.1915 | 0.8369 | 0.2509 |
|                                     |           | 3      | 2.9218 | 0.8995 | 0.2783 | 2.0408 | 0.8564 | 0.2234 | 2.2901 | 0.7377 | 0.2048 |
|                                     | 50[80%]   | 1      | 2.9258 | 0.8972 | 0.2700 | 2.0571 | 0.8612 | 0.2513 | 3.1165 | 0.6349 | 0.1946 |
|                                     |           | 2      | 2.9902 | 0.8637 | 0.2597 | 3.6211 | 0.7446 | 0.2281 | 3.2120 | 0.5659 | 0.1634 |
|                                     |           | 3      | 3.5098 | 0.8345 | 0.2334 | 3.4638 | 0.6782 | 0.1880 | 3.2605 | 0.5771 | 0.1622 |
|                                     | 80[40%]   | 1      | 3.4787 | 0.8030 | 0.2537 | 2.8876 | 0.7919 | 0.2175 | 3.2528 | 0.5984 | 0.1520 |
|                                     |           | 2      | 3.4640 | 0.7291 | 0.2197 | 3.4508 | 0.7014 | 0.1938 | 3.2213 | 0.5199 | 0.1390 |
|                                     |           | 3      | 2.5477 | 0.6882 | 0.1979 | 2.8018 | 0.6585 | 0.1743 | 3.0390 | 0.4653 | 0.1418 |
|                                     | 80[80%]   | 1      | 3.4287 | 0.6806 | 0.2107 | 3.3894 | 0.5849 | 0.1611 | 3.0515 | 0.4950 | 0.1440 |
|                                     |           | 2      | 3.4264 | 0.6717 | 0.1954 | 3.3437 | 0.5447 | 0.1522 | 3.0579 | 0.4758 | 0.1320 |
|                                     |           | 3      | 2.8652 | 0.6115 | 0.1716 | 2.7011 | 0.5300 | 0.1470 | 3.1863 | 0.4422 | 0.1269 |
| (0.4,0.8)                           | 50[40%]   | 1      | 2.9325 | 1.0864 | 0.3158 | 2.3709 | 0.9318 | 0.2826 | 2.1544 | 0.8736 | 0.2623 |
|                                     |           | 2      | 3.5831 | 0.9117 | 0.2806 | 2.9802 | 0.9134 | 0.2782 | 2.2572 | 0.7633 | 0.2159 |
|                                     |           | 3      | 2.4124 | 0.8944 | 0.2459 | 3.6530 | 0.8215 | 0.2398 | 2.3940 | 0.6568 | 0.1870 |
|                                     | 50[80%]   | 1      | 3.6462 | 0.8920 | 0.2966 | 3.8800 | 0.8514 | 0.2336 | 3.0851 | 0.6191 | 0.1907 |
|                                     |           | 2      | 2.2505 | 0.8422 | 0.2674 | 2.8118 | 0.7174 | 0.2198 | 3.2038 | 0.5512 | 0.1596 |
|                                     |           | 3      | 2.8195 | 0.7985 | 0.2213 | 2.8198 | 0.6773 | 0.1987 | 3.0527 | 0.4951 | 0.1520 |
|                                     | 80[40%]   | 1      | 2.8259 | 0.7850 | 0.2183 | 3.4639 | 0.7415 | 0.2036 | 3.2528 | 0.4984 | 0.1540 |
|                                     |           | 2      | 2.8394 | 0.7200 | 0.2065 | 2.9567 | 0.6912 | 0.1847 | 3.2438 | 0.4871 | 0.1458 |
|                                     |           | 3      | 2.9080 | 0.6666 | 0.1897 | 2.6027 | 0.6032 | 0.1615 | 3.0087 | 0.4571 | 0.1407 |
|                                     | 80[80%]   | 1      | 2.8646 | 0.6522 | 0.1863 | 2.8521 | 0.5602 | 0.1545 | 3.2502 | 0.4889 | 0.1408 |
|                                     |           | 2      | 2.8755 | 0.6138 | 0.1739 | 2.8590 | 0.5195 | 0.1428 | 3.0009 | 0.4514 | 0.1353 |
|                                     |           | 3      | 3.0833 | 0.5015 | 0.1385 | 2.8442 | 0.4748 | 0.1328 | 2.7736 | 0.4103 | 0.1203 |

Table S8: The Av.Es ( $1^{st}$  column), RMSEs ( $2^{nd}$  column) and MRABs ( $3^{rd}$  column) of  $h(t)$  from Set-2.

| $(T_1, T_2)$<br>Prior $\rightarrow$ | $n$ [FP%] | Scheme | MLE    |        |        | MCMC   |        |        |        |        |        |
|-------------------------------------|-----------|--------|--------|--------|--------|--------|--------|--------|--------|--------|--------|
|                                     |           |        |        |        |        | 1      |        |        | 2      |        |        |
| (0.1,0.3)                           | 50[40%]   | 1      | 0.5971 | 0.3987 | 0.9087 | 0.2805 | 0.2304 | 0.6627 | 0.1764 | 0.1369 | 0.3712 |
|                                     |           | 2      | 0.5043 | 0.3182 | 0.8840 | 0.2563 | 0.2195 | 0.6147 | 0.1781 | 0.1345 | 0.3640 |
|                                     |           | 3      | 0.5123 | 0.3108 | 0.8430 | 0.2543 | 0.1922 | 0.5796 | 0.1715 | 0.1342 | 0.3534 |
|                                     | 50[80%]   | 1      | 0.4968 | 0.3205 | 0.8830 | 0.2507 | 0.2193 | 0.5928 | 0.2029 | 0.1053 | 0.2680 |
|                                     |           | 2      | 0.5218 | 0.3042 | 0.7633 | 0.2467 | 0.1956 | 0.5766 | 0.2205 | 0.0957 | 0.2278 |
|                                     |           | 3      | 0.5223 | 0.3023 | 0.6907 | 0.2493 | 0.1841 | 0.4870 | 0.2270 | 0.0914 | 0.2194 |
|                                     | 80[40%]   | 1      | 0.2783 | 0.2049 | 0.6532 | 0.1064 | 0.1715 | 0.5470 | 0.2402 | 0.0807 | 0.1900 |
|                                     |           | 2      | 0.3682 | 0.1967 | 0.6321 | 0.2485 | 0.1515 | 0.5104 | 0.2469 | 0.0772 | 0.1755 |
|                                     |           | 3      | 0.3682 | 0.1861 | 0.5755 | 0.2510 | 0.1422 | 0.4610 | 0.2492 | 0.0731 | 0.1721 |
|                                     | 80[80%]   | 1      | 0.2596 | 0.1847 | 0.5060 | 0.5974 | 0.1585 | 0.3527 | 0.1836 | 0.0757 | 0.1605 |
|                                     |           | 2      | 0.2560 | 0.1743 | 0.5841 | 0.1598 | 0.1397 | 0.3290 | 0.2601 | 0.0728 | 0.1570 |
|                                     |           | 3      | 0.2771 | 0.1670 | 0.4823 | 0.2083 | 0.1276 | 0.3250 | 0.2645 | 0.0684 | 0.1470 |
| (0.4,0.8)                           | 50[40%]   | 1      | 0.5971 | 0.3087 | 0.8802 | 0.2605 | 0.2274 | 0.6519 | 0.1778 | 0.1172 | 0.3661 |
|                                     |           | 2      | 0.5139 | 0.2943 | 0.8439 | 0.2408 | 0.1893 | 0.5839 | 0.1800 | 0.1125 | 0.3579 |
|                                     |           | 3      | 0.5043 | 0.2823 | 0.8259 | 0.2454 | 0.1788 | 0.5764 | 0.1846 | 0.1080 | 0.3435 |
|                                     | 50[80%]   | 1      | 0.4325 | 0.2348 | 0.7928 | 0.2697 | 0.1823 | 0.5848 | 0.2029 | 0.0853 | 0.2580 |
|                                     |           | 2      | 0.4309 | 0.2244 | 0.6331 | 0.2636 | 0.1776 | 0.5711 | 0.2264 | 0.0734 | 0.2203 |
|                                     |           | 3      | 0.4192 | 0.2142 | 0.6031 | 0.2663 | 0.1706 | 0.4499 | 0.2370 | 0.0703 | 0.2118 |
|                                     | 80[40%]   | 1      | 0.4327 | 0.1925 | 0.6255 | 0.2783 | 0.1603 | 0.4642 | 0.2327 | 0.0587 | 0.1744 |
|                                     |           | 2      | 0.3871 | 0.1869 | 0.5817 | 0.2612 | 0.1485 | 0.4049 | 0.2321 | 0.0590 | 0.1696 |
|                                     |           | 3      | 0.3889 | 0.1804 | 0.5469 | 0.2623 | 0.1403 | 0.3835 | 0.2338 | 0.0582 | 0.1587 |
|                                     | 80[80%]   | 1      | 0.2777 | 0.1687 | 0.4915 | 0.1423 | 0.1552 | 0.4169 | 0.2840 | 0.0492 | 0.1491 |
|                                     |           | 2      | 0.2736 | 0.1603 | 0.4698 | 0.1386 | 0.1350 | 0.3655 | 0.2974 | 0.0531 | 0.1548 |
|                                     |           | 3      | 0.2749 | 0.1595 | 0.4277 | 0.1198 | 0.1271 | 0.2949 | 0.2878 | 0.0487 | 0.1462 |



Table S9: The ACLs (1<sup>st</sup> column) and CPs (2<sup>nd</sup> column) of 95% ACI/HPD intervals of  $\alpha$ .

| $(\alpha, \mu)$<br>Prior $\rightarrow$ | $(T_1, T_2)$ | $(n, m)$ | Scheme | ACI    |       | HPD    |       |        |       |
|----------------------------------------|--------------|----------|--------|--------|-------|--------|-------|--------|-------|
|                                        |              |          |        |        |       | 1      |       | 2      |       |
| (1.2, 0.2)                             | (0.1, 0.3)   | 50[40%]  | 1      | 1.4388 | 0.913 | 0.4018 | 0.937 | 0.1961 | 0.967 |
|                                        |              |          | 2      | 1.6028 | 0.897 | 0.4138 | 0.935 | 0.2054 | 0.965 |
|                                        |              |          | 3      | 1.7345 | 0.891 | 0.4201 | 0.931 | 0.2366 | 0.961 |
|                                        |              | 50[80%]  | 1      | 1.1514 | 0.920 | 0.3773 | 0.945 | 0.1674 | 0.970 |
|                                        |              |          | 2      | 1.4478 | 0.913 | 0.3893 | 0.944 | 0.1871 | 0.969 |
|                                        |              |          | 3      | 1.5157 | 0.911 | 0.3974 | 0.944 | 0.1944 | 0.968 |
|                                        |              | 80[40%]  | 1      | 0.9417 | 0.928 | 0.3363 | 0.952 | 0.1385 | 0.973 |
|                                        |              |          | 2      | 0.9790 | 0.926 | 0.3406 | 0.952 | 0.1385 | 0.973 |
|                                        |              |          | 3      | 1.1663 | 0.923 | 0.3701 | 0.950 | 0.1399 | 0.973 |
|                                        |              | 80[80%]  | 1      | 0.7081 | 0.934 | 0.3084 | 0.956 | 0.1197 | 0.977 |
|                                        |              |          | 2      | 0.7962 | 0.932 | 0.3261 | 0.954 | 0.1241 | 0.977 |
|                                        |              |          | 3      | 0.9139 | 0.929 | 0.3317 | 0.954 | 0.1274 | 0.976 |
|                                        | (0.4, 0.8)   | 50[40%]  | 1      | 1.1549 | 0.918 | 0.3889 | 0.939 | 0.1485 | 0.973 |
|                                        |              |          | 2      | 1.4646 | 0.906 | 0.4049 | 0.936 | 0.1376 | 0.972 |
|                                        |              |          | 3      | 1.6267 | 0.901 | 0.4117 | 0.932 | 0.1364 | 0.972 |
|                                        |              | 50[80%]  | 1      | 1.1100 | 0.924 | 0.3387 | 0.947 | 0.1260 | 0.975 |
|                                        |              |          | 2      | 1.3583 | 0.917 | 0.3396 | 0.947 | 0.1227 | 0.975 |
|                                        |              |          | 3      | 1.3834 | 0.915 | 0.3779 | 0.945 | 0.1199 | 0.975 |
|                                        |              | 80[40%]  | 1      | 0.8805 | 0.931 | 0.3181 | 0.954 | 0.1019 | 0.978 |
|                                        |              |          | 2      | 0.9648 | 0.927 | 0.3390 | 0.952 | 0.1049 | 0.978 |
|                                        |              |          | 3      | 1.0189 | 0.925 | 0.3489 | 0.951 | 0.1104 | 0.977 |
|                                        |              | 80[80%]  | 1      | 0.3230 | 0.941 | 0.2406 | 0.959 | 0.0909 | 0.980 |
|                                        |              |          | 2      | 0.4787 | 0.937 | 0.2908 | 0.956 | 0.0973 | 0.980 |
|                                        |              |          | 3      | 0.7811 | 0.932 | 0.3333 | 0.954 | 0.0995 | 0.979 |
| (1.5, 0.5)                             | (0.1, 0.3)   | 50[40%]  | 1      | 0.9627 | 0.922 | 0.3452 | 0.942 | 0.1384 | 0.954 |
|                                        |              |          | 2      | 0.9804 | 0.920 | 0.4276 | 0.940 | 0.1474 | 0.952 |
|                                        |              |          | 3      | 1.0899 | 0.919 | 0.5757 | 0.933 | 0.1598 | 0.949 |
|                                        |              | 50[80%]  | 1      | 0.8652 | 0.928 | 0.3408 | 0.943 | 0.1137 | 0.961 |
|                                        |              |          | 2      | 0.9245 | 0.926 | 0.3679 | 0.941 | 0.1237 | 0.959 |
|                                        |              |          | 3      | 0.9628 | 0.924 | 0.4185 | 0.938 | 0.1286 | 0.958 |
|                                        |              | 80[40%]  | 1      | 0.7803 | 0.934 | 0.3285 | 0.947 | 0.1026 | 0.962 |
|                                        |              |          | 2      | 0.8752 | 0.931 | 0.3557 | 0.943 | 0.1127 | 0.960 |
|                                        |              |          | 3      | 0.9121 | 0.929 | 0.4140 | 0.940 | 0.1219 | 0.959 |
|                                        |              | 80[80%]  | 1      | 0.7116 | 0.938 | 0.3221 | 0.948 | 0.0966 | 0.966 |
|                                        |              |          | 2      | 0.7764 | 0.935 | 0.3339 | 0.945 | 0.0963 | 0.966 |
|                                        |              |          | 3      | 0.8462 | 0.930 | 0.4011 | 0.941 | 0.0945 | 0.965 |
|                                        | (0.4, 0.8)   | 50[40%]  | 1      | 0.9224 | 0.925 | 0.3416 | 0.943 | 0.1352 | 0.955 |
|                                        |              |          | 2      | 0.9419 | 0.923 | 0.3943 | 0.942 | 0.1394 | 0.954 |
|                                        |              |          | 3      | 0.9525 | 0.921 | 0.4566 | 0.936 | 0.1464 | 0.951 |
|                                        |              | 50[80%]  | 1      | 0.8231 | 0.930 | 0.3286 | 0.945 | 0.1127 | 0.961 |
|                                        |              |          | 2      | 0.9045 | 0.928 | 0.3583 | 0.943 | 0.1203 | 0.960 |
|                                        |              |          | 3      | 0.9244 | 0.927 | 0.3902 | 0.940 | 0.1227 | 0.958 |
|                                        |              | 80[40%]  | 1      | 0.7523 | 0.935 | 0.3168 | 0.948 | 0.0990 | 0.963 |
|                                        |              |          | 2      | 0.8693 | 0.932 | 0.3408 | 0.944 | 0.1046 | 0.961 |
|                                        |              |          | 3      | 0.9014 | 0.929 | 0.3452 | 0.943 | 0.1147 | 0.959 |
|                                        |              | 80[80%]  | 1      | 0.6752 | 0.941 | 0.2978 | 0.950 | 0.0926 | 0.967 |
|                                        |              |          | 2      | 0.7311 | 0.939 | 0.3099 | 0.951 | 0.0961 | 0.966 |
|                                        |              |          | 3      | 0.7920 | 0.934 | 0.3162 | 0.951 | 0.0950 | 0.965 |

Table S10: The ACLs ( $1^{st}$  column) and CPs ( $2^{nd}$  column) of 95% ACI/HPD intervals of  $\mu$ .

| $(\alpha, \mu)$<br>Prior $\rightarrow$ | $(T_1, T_2)$ | $(n, m)$ | Scheme | ACI    |       | HPD    |       |        |       |
|----------------------------------------|--------------|----------|--------|--------|-------|--------|-------|--------|-------|
|                                        |              |          |        |        |       | 1      |       | 2      |       |
| (1.2, 0.2)                             | (0.1, 0.3)   | 50[40%]  | 1      | 0.3107 | 0.940 | 0.1951 | 0.957 | 0.1141 | 0.966 |
|                                        |              |          | 2      | 0.2919 | 0.942 | 0.1349 | 0.959 | 0.0996 | 0.967 |
|                                        |              |          | 3      | 0.2768 | 0.944 | 0.1290 | 0.960 | 0.0957 | 0.970 |
|                                        |              | 50[80%]  | 1      | 0.2719 | 0.946 | 0.1207 | 0.962 | 0.0904 | 0.970 |
|                                        |              |          | 2      | 0.2615 | 0.947 | 0.1124 | 0.964 | 0.0776 | 0.971 |
|                                        |              |          | 3      | 0.2573 | 0.947 | 0.0913 | 0.965 | 0.0763 | 0.972 |
|                                        |              | 80[40%]  | 1      | 0.2568 | 0.948 | 0.1043 | 0.964 | 0.0906 | 0.973 |
|                                        |              |          | 2      | 0.2304 | 0.950 | 0.0975 | 0.965 | 0.0695 | 0.974 |
|                                        |              |          | 3      | 0.2153 | 0.952 | 0.0861 | 0.966 | 0.0689 | 0.974 |
|                                        |              | 80[80%]  | 1      | 0.2165 | 0.951 | 0.0736 | 0.967 | 0.0655 | 0.974 |
|                                        |              |          | 2      | 0.2048 | 0.953 | 0.0722 | 0.967 | 0.0579 | 0.976 |
|                                        |              |          | 3      | 0.2033 | 0.953 | 0.0700 | 0.967 | 0.0566 | 0.977 |
|                                        | (0.4, 0.8)   | 50[40%]  | 1      | 0.2939 | 0.945 | 0.1841 | 0.959 | 0.1016 | 0.968 |
|                                        |              |          | 2      | 0.2757 | 0.946 | 0.1293 | 0.960 | 0.0966 | 0.969 |
|                                        |              |          | 3      | 0.2440 | 0.948 | 0.1200 | 0.961 | 0.0937 | 0.970 |
|                                        |              | 50[80%]  | 1      | 0.2556 | 0.948 | 0.0953 | 0.965 | 0.0796 | 0.971 |
|                                        |              |          | 2      | 0.2469 | 0.949 | 0.0922 | 0.965 | 0.0741 | 0.971 |
|                                        |              |          | 3      | 0.2417 | 0.949 | 0.0909 | 0.965 | 0.0736 | 0.972 |
|                                        |              | 80[40%]  | 1      | 0.2433 | 0.950 | 0.0943 | 0.965 | 0.0796 | 0.973 |
|                                        |              |          | 2      | 0.2198 | 0.952 | 0.0824 | 0.968 | 0.0681 | 0.974 |
|                                        |              |          | 3      | 0.1918 | 0.954 | 0.0775 | 0.968 | 0.0657 | 0.974 |
|                                        |              | 80[80%]  | 1      | 0.2038 | 0.953 | 0.0744 | 0.967 | 0.0566 | 0.976 |
|                                        |              |          | 2      | 0.1956 | 0.954 | 0.0696 | 0.967 | 0.0558 | 0.976 |
|                                        |              |          | 3      | 0.1807 | 0.955 | 0.0673 | 0.967 | 0.0550 | 0.977 |
| (1.5, 0.5)                             | (0.1, 0.3)   | 50[40%]  | 1      | 1.1448 | 0.928 | 0.2950 | 0.952 | 0.2133 | 0.958 |
|                                        |              |          | 2      | 1.0178 | 0.932 | 0.2453 | 0.956 | 0.2020 | 0.961 |
|                                        |              |          | 3      | 1.0051 | 0.933 | 0.2353 | 0.958 | 0.1980 | 0.962 |
|                                        |              | 50[80%]  | 1      | 1.0077 | 0.932 | 0.2169 | 0.961 | 0.1797 | 0.965 |
|                                        |              |          | 2      | 0.7728 | 0.938 | 0.2087 | 0.963 | 0.1647 | 0.967 |
|                                        |              |          | 3      | 0.7668 | 0.940 | 0.2006 | 0.964 | 0.1524 | 0.968 |
|                                        |              | 80[40%]  | 1      | 0.9079 | 0.934 | 0.2060 | 0.964 | 0.1592 | 0.969 |
|                                        |              |          | 2      | 0.7578 | 0.939 | 0.1688 | 0.967 | 0.1389 | 0.972 |
|                                        |              |          | 3      | 0.7205 | 0.942 | 0.1697 | 0.967 | 0.1239 | 0.976 |
|                                        |              | 80[80%]  | 1      | 0.7923 | 0.937 | 0.1987 | 0.965 | 0.1286 | 0.976 |
|                                        |              |          | 2      | 0.6931 | 0.942 | 0.1622 | 0.967 | 0.1176 | 0.978 |
|                                        |              |          | 3      | 0.5220 | 0.946 | 0.1583 | 0.968 | 0.1021 | 0.980 |
|                                        | (0.4, 0.8)   | 50[40%]  | 1      | 0.8122 | 0.936 | 0.2723 | 0.955 | 0.2028 | 0.960 |
|                                        |              |          | 2      | 0.7663 | 0.939 | 0.2347 | 0.958 | 0.1934 | 0.962 |
|                                        |              |          | 3      | 0.7263 | 0.943 | 0.2287 | 0.958 | 0.1914 | 0.962 |
|                                        |              | 50[80%]  | 1      | 0.7205 | 0.939 | 0.2169 | 0.961 | 0.1732 | 0.967 |
|                                        |              |          | 2      | 0.6931 | 0.941 | 0.2087 | 0.963 | 0.1403 | 0.972 |
|                                        |              |          | 3      | 0.6853 | 0.942 | 0.2065 | 0.963 | 0.1358 | 0.974 |
|                                        |              | 80[40%]  | 1      | 0.6773 | 0.942 | 0.1939 | 0.965 | 0.1309 | 0.975 |
|                                        |              |          | 2      | 0.6099 | 0.944 | 0.1648 | 0.967 | 0.1283 | 0.976 |
|                                        |              |          | 3      | 0.5710 | 0.947 | 0.1602 | 0.968 | 0.1105 | 0.978 |
|                                        |              | 80[80%]  | 1      | 0.5815 | 0.945 | 0.1790 | 0.968 | 0.1024 | 0.979 |
|                                        |              |          | 2      | 0.5522 | 0.947 | 0.1494 | 0.969 | 0.1005 | 0.978 |
|                                        |              |          | 3      | 0.5416 | 0.948 | 0.1290 | 0.972 | 0.0946 | 0.981 |

Table S11: The ACLs ( $1^{st}$  column) and CPs ( $2^{nd}$  column) of 95% ACI/HPD intervals of  $R(t)$ .

| $(\alpha, \mu)$     | $(T_1, T_2)$ | $(n, m)$ | Scheme | ACI    |        | HPD    |       |        |       |
|---------------------|--------------|----------|--------|--------|--------|--------|-------|--------|-------|
| Prior $\rightarrow$ |              |          |        |        |        | 1      | 2     |        |       |
| (1.2,0.2)           | (0.1,0.3)    | 50[40%]  | 1      | 0.1925 | 0.902  | 0.1807 | 0.909 | 0.1276 | 0.928 |
|                     |              |          | 2      | 0.1715 | 0.907  | 0.1484 | 0.913 | 0.1082 | 0.932 |
|                     |              |          | 3      | 0.1639 | 0.909  | 0.1414 | 0.914 | 0.1004 | 0.933 |
|                     |              | 50[80%]  | 1      | 0.1787 | 0.917  | 0.1617 | 0.922 | 0.1131 | 0.931 |
|                     |              |          | 2      | 0.1629 | 0.919  | 0.1401 | 0.924 | 0.0989 | 0.934 |
|                     |              |          | 3      | 0.1587 | 0.920  | 0.1380 | 0.926 | 0.0951 | 0.936 |
|                     |              | 80[40%]  | 1      | 0.1603 | 0.926  | 0.1534 | 0.928 | 0.0994 | 0.938 |
|                     |              |          | 2      | 0.1381 | 0.931  | 0.1207 | 0.935 | 0.0879 | 0.940 |
|                     |              |          | 3      | 0.1353 | 0.932  | 0.1153 | 0.937 | 0.0854 | 0.940 |
|                     |              | 80[80%]  | 1      | 0.1282 | 0.934  | 0.1244 | 0.936 | 0.0866 | 0.940 |
|                     |              |          | 2      | 0.1199 | 0.937  | 0.1151 | 0.939 | 0.0836 | 0.941 |
|                     |              |          | 3      | 0.1182 | 0.937  | 0.1119 | 0.940 | 0.0833 | 0.942 |
|                     | (0.4,0.8)    | 50[40%]  | 1      | 0.1905 | 0.908  | 0.1728 | 0.913 | 0.1238 | 0.930 |
|                     |              |          | 2      | 0.1606 | 0.9130 | 0.1507 | 0.918 | 0.1022 | 0.933 |
|                     |              |          | 3      | 0.1487 | 0.9180 | 0.1378 | 0.921 | 0.0961 | 0.935 |
|                     |              | 50[80%]  | 1      | 0.1600 | 0.920  | 0.1565 | 0.920 | 0.0999 | 0.933 |
|                     |              |          | 2      | 0.1459 | 0.923  | 0.1421 | 0.925 | 0.0971 | 0.935 |
|                     |              |          | 3      | 0.1414 | 0.924  | 0.1241 | 0.929 | 0.0901 | 0.934 |
|                     |              | 80[40%]  | 1      | 0.1522 | 0.930  | 0.1354 | 0.932 | 0.0979 | 0.940 |
|                     |              |          | 2      | 0.1249 | 0.935  | 0.1199 | 0.935 | 0.0855 | 0.942 |
|                     |              |          | 3      | 0.1169 | 0.938  | 0.1121 | 0.938 | 0.0806 | 0.945 |
|                     |              | 80[80%]  | 1      | 0.1300 | 0.9360 | 0.1236 | 0.936 | 0.0850 | 0.941 |
|                     |              |          | 2      | 0.1193 | 0.938  | 0.1132 | 0.940 | 0.0812 | 0.942 |
|                     |              |          | 3      | 0.1060 | 0.9400 | 0.0988 | 0.943 | 0.0751 | 0.947 |
| (1.5,0.5)           | (0.1,0.3)    | 50[40%]  | 1      | 0.1372 | 0.949  | 0.1289 | 0.956 | 0.0986 | 0.962 |
|                     |              |          | 2      | 0.1284 | 0.951  | 0.1241 | 0.957 | 0.0894 | 0.964 |
|                     |              |          | 3      | 0.1239 | 0.952  | 0.1203 | 0.959 | 0.0844 | 0.964 |
|                     |              | 50[80%]  | 1      | 0.1252 | 0.952  | 0.1235 | 0.958 | 0.0940 | 0.963 |
|                     |              |          | 2      | 0.1238 | 0.953  | 0.1194 | 0.960 | 0.0879 | 0.964 |
|                     |              |          | 3      | 0.1222 | 0.955  | 0.1164 | 0.961 | 0.0829 | 0.966 |
|                     |              | 80[40%]  | 1      | 0.1216 | 0.954  | 0.1163 | 0.962 | 0.0881 | 0.965 |
|                     |              |          | 2      | 0.1199 | 0.955  | 0.1117 | 0.962 | 0.0855 | 0.966 |
|                     |              |          | 3      | 0.1185 | 0.956  | 0.1077 | 0.963 | 0.0810 | 0.967 |
|                     |              | 80[80%]  | 1      | 0.1202 | 0.956  | 0.1106 | 0.964 | 0.0844 | 0.966 |
|                     |              |          | 2      | 0.1184 | 0.957  | 0.1068 | 0.965 | 0.0795 | 0.968 |
|                     |              |          | 3      | 0.1172 | 0.957  | 0.1008 | 0.965 | 0.0744 | 0.970 |
|                     | (0.4,0.8)    | 50[40%]  | 1      | 0.1278 | 0.952  | 0.1268 | 0.957 | 0.0941 | 0.963 |
|                     |              |          | 2      | 0.1247 | 0.951  | 0.1229 | 0.958 | 0.0859 | 0.964 |
|                     |              |          | 3      | 0.1230 | 0.952  | 0.1188 | 0.960 | 0.0828 | 0.964 |
|                     |              | 50[80%]  | 1      | 0.1242 | 0.953  | 0.1216 | 0.959 | 0.0911 | 0.964 |
|                     |              |          | 2      | 0.1230 | 0.953  | 0.1164 | 0.961 | 0.0863 | 0.964 |
|                     |              |          | 3      | 0.1214 | 0.956  | 0.1161 | 0.961 | 0.0794 | 0.967 |
|                     |              | 80[40%]  | 1      | 0.1208 | 0.955  | 0.1088 | 0.963 | 0.0846 | 0.965 |
|                     |              |          | 2      | 0.1191 | 0.955  | 0.1099 | 0.963 | 0.0805 | 0.967 |
|                     |              |          | 3      | 0.1178 | 0.956  | 0.0978 | 0.964 | 0.0797 | 0.967 |
|                     |              | 80[80%]  | 1      | 0.1184 | 0.957  | 0.0971 | 0.966 | 0.0819 | 0.967 |
|                     |              |          | 2      | 0.1169 | 0.958  | 0.0962 | 0.966 | 0.0740 | 0.969 |
|                     |              |          | 3      | 0.1150 | 0.958  | 0.0957 | 0.967 | 0.0687 | 0.971 |

Table S12: The ACLs ( $1^{st}$  column) and CPs ( $2^{nd}$  column) of 95% ACI/HPD intervals of  $h(t)$ .

| $(\alpha, \mu)$<br>Prior $\rightarrow$ | $(T_1, T_2)$ | $(n, m)$ | Scheme | ACI    |       | HPD    |       |        |       |
|----------------------------------------|--------------|----------|--------|--------|-------|--------|-------|--------|-------|
|                                        |              |          |        |        |       | 1      |       | 2      |       |
| (1.2, 0.2)                             | (0.1, 0.3)   | 50[40%]  | 1      | 3.6061 | 0.915 | 2.9035 | 0.925 | 1.8384 | 0.939 |
|                                        |              |          | 2      | 3.4713 | 0.923 | 2.2549 | 0.931 | 1.6089 | 0.945 |
|                                        |              |          | 3      | 2.8895 | 0.929 | 2.1788 | 0.934 | 1.5837 | 0.948 |
|                                        |              | 50[80%]  | 1      | 3.2835 | 0.921 | 2.4087 | 0.931 | 1.5949 | 0.947 |
|                                        |              |          | 2      | 2.7403 | 0.926 | 2.1931 | 0.934 | 1.4641 | 0.952 |
|                                        |              |          | 3      | 2.6330 | 0.928 | 2.1424 | 0.936 | 1.4537 | 0.952 |
|                                        |              | 80[40%]  | 1      | 2.9237 | 0.925 | 2.3017 | 0.934 | 1.4500 | 0.953 |
|                                        |              |          | 2      | 2.6938 | 0.927 | 1.9328 | 0.937 | 1.4059 | 0.955 |
|                                        |              |          | 3      | 2.2524 | 0.931 | 1.8672 | 0.939 | 1.3782 | 0.957 |
|                                        |              | 80[80%]  | 1      | 2.3345 | 0.930 | 1.7630 | 0.941 | 1.2762 | 0.962 |
|                                        |              |          | 2      | 2.1385 | 0.933 | 1.6522 | 0.943 | 1.2505 | 0.964 |
|                                        |              |          | 3      | 2.0988 | 0.934 | 1.6367 | 0.944 | 1.2339 | 0.967 |
|                                        | (0.4, 0.8)   | 50[40%]  | 1      | 3.4116 | 0.921 | 2.8621 | 0.927 | 1.8303 | 0.940 |
|                                        |              |          | 2      | 3.3206 | 0.925 | 2.2211 | 0.933 | 1.5837 | 0.946 |
|                                        |              |          | 3      | 2.7824 | 0.931 | 2.0977 | 0.935 | 1.4673 | 0.950 |
|                                        |              | 50[80%]  | 1      | 3.0933 | 0.925 | 2.2622 | 0.933 | 1.4821 | 0.949 |
|                                        |              |          | 2      | 2.5861 | 0.928 | 2.1585 | 0.936 | 1.4503 | 0.953 |
|                                        |              |          | 3      | 2.5087 | 0.930 | 2.0622 | 0.938 | 1.4326 | 0.954 |
|                                        |              | 80[40%]  | 1      | 2.6182 | 0.929 | 2.0883 | 0.937 | 1.4364 | 0.955 |
|                                        |              |          | 2      | 2.2172 | 0.932 | 1.9073 | 0.938 | 1.3904 | 0.957 |
|                                        |              |          | 3      | 2.0540 | 0.935 | 1.7436 | 0.941 | 1.2500 | 0.960 |
|                                        |              | 80[80%]  | 1      | 2.0526 | 0.935 | 1.7444 | 0.942 | 1.2616 | 0.963 |
|                                        |              |          | 2      | 1.9874 | 0.937 | 1.6462 | 0.945 | 1.2458 | 0.964 |
|                                        |              |          | 3      | 1.6342 | 0.940 | 1.5975 | 0.947 | 1.2273 | 0.968 |
| (1.5, 0.5)                             | (0.1, 0.3)   | 50[40%]  | 1      | 0.8860 | 0.929 | 0.8113 | 0.932 | 0.2974 | 0.953 |
|                                        |              |          | 2      | 0.7965 | 0.932 | 0.7389 | 0.936 | 0.2435 | 0.956 |
|                                        |              |          | 3      | 0.7428 | 0.935 | 0.6565 | 0.940 | 0.2197 | 0.960 |
|                                        |              | 50[80%]  | 1      | 0.7826 | 0.933 | 0.6955 | 0.938 | 0.2242 | 0.957 |
|                                        |              |          | 2      | 0.7574 | 0.934 | 0.6438 | 0.943 | 0.1838 | 0.959 |
|                                        |              |          | 3      | 0.7297 | 0.938 | 0.6108 | 0.946 | 0.1755 | 0.962 |
|                                        |              | 80[40%]  | 1      | 0.7512 | 0.935 | 0.5851 | 0.947 | 0.2017 | 0.960 |
|                                        |              |          | 2      | 0.6417 | 0.940 | 0.5385 | 0.950 | 0.1785 | 0.962 |
|                                        |              |          | 3      | 0.6316 | 0.942 | 0.4309 | 0.953 | 0.1533 | 0.964 |
|                                        |              | 80[80%]  | 1      | 0.6900 | 0.938 | 0.4565 | 0.951 | 0.1849 | 0.961 |
|                                        |              |          | 2      | 0.6161 | 0.944 | 0.3595 | 0.954 | 0.1654 | 0.963 |
|                                        |              |          | 3      | 0.5736 | 0.947 | 0.3097 | 0.958 | 0.1430 | 0.967 |
|                                        | (0.4, 0.8)   | 50[40%]  | 1      | 0.8503 | 0.933 | 0.6955 | 0.940 | 0.2499 | 0.956 |
|                                        |              |          | 2      | 0.7811 | 0.935 | 0.6338 | 0.943 | 0.2196 | 0.959 |
|                                        |              |          | 3      | 0.7303 | 0.938 | 0.6108 | 0.944 | 0.1946 | 0.962 |
|                                        |              | 50[80%]  | 1      | 0.7426 | 0.935 | 0.6741 | 0.942 | 0.1959 | 0.960 |
|                                        |              |          | 2      | 0.7328 | 0.937 | 0.6112 | 0.945 | 0.1816 | 0.959 |
|                                        |              |          | 3      | 0.7074 | 0.940 | 0.5974 | 0.946 | 0.1602 | 0.963 |
|                                        |              | 80[40%]  | 1      | 0.7104 | 0.941 | 0.5630 | 0.949 | 0.1849 | 0.962 |
|                                        |              |          | 2      | 0.6239 | 0.943 | 0.5206 | 0.952 | 0.1594 | 0.965 |
|                                        |              |          | 3      | 0.6072 | 0.945 | 0.4109 | 0.955 | 0.1458 | 0.966 |
|                                        |              | 80[80%]  | 1      | 0.6771 | 0.942 | 0.3614 | 0.954 | 0.1699 | 0.965 |
|                                        |              |          | 2      | 0.6012 | 0.944 | 0.3426 | 0.956 | 0.1533 | 0.966 |
|                                        |              |          | 3      | 0.5420 | 0.949 | 0.2927 | 0.960 | 0.1349 | 0.969 |
